# Supplementary material for: Mechanistic insights into tRNA cleavage by a contact-dependent growth inhibitor protein and translation factors
Source: PubMed Central journal article supplement (PMC9071432; doi:10.1093/nar/gkac228), 2022-04-12
Supplement: gkac228_supplemental_file.pdf [file gkac228_supplemental_file.pdf]

## **Supplementary Information**

### **Mechanistic insights into tRNA cleavage by a contact-dependent growth inhibitor protein and translation factors**

Jing Wang, Yuka Yashiro, Yuriko Sakaguchi, Tsutomu Suzuki, Kozo Tomita

**Figure S1**

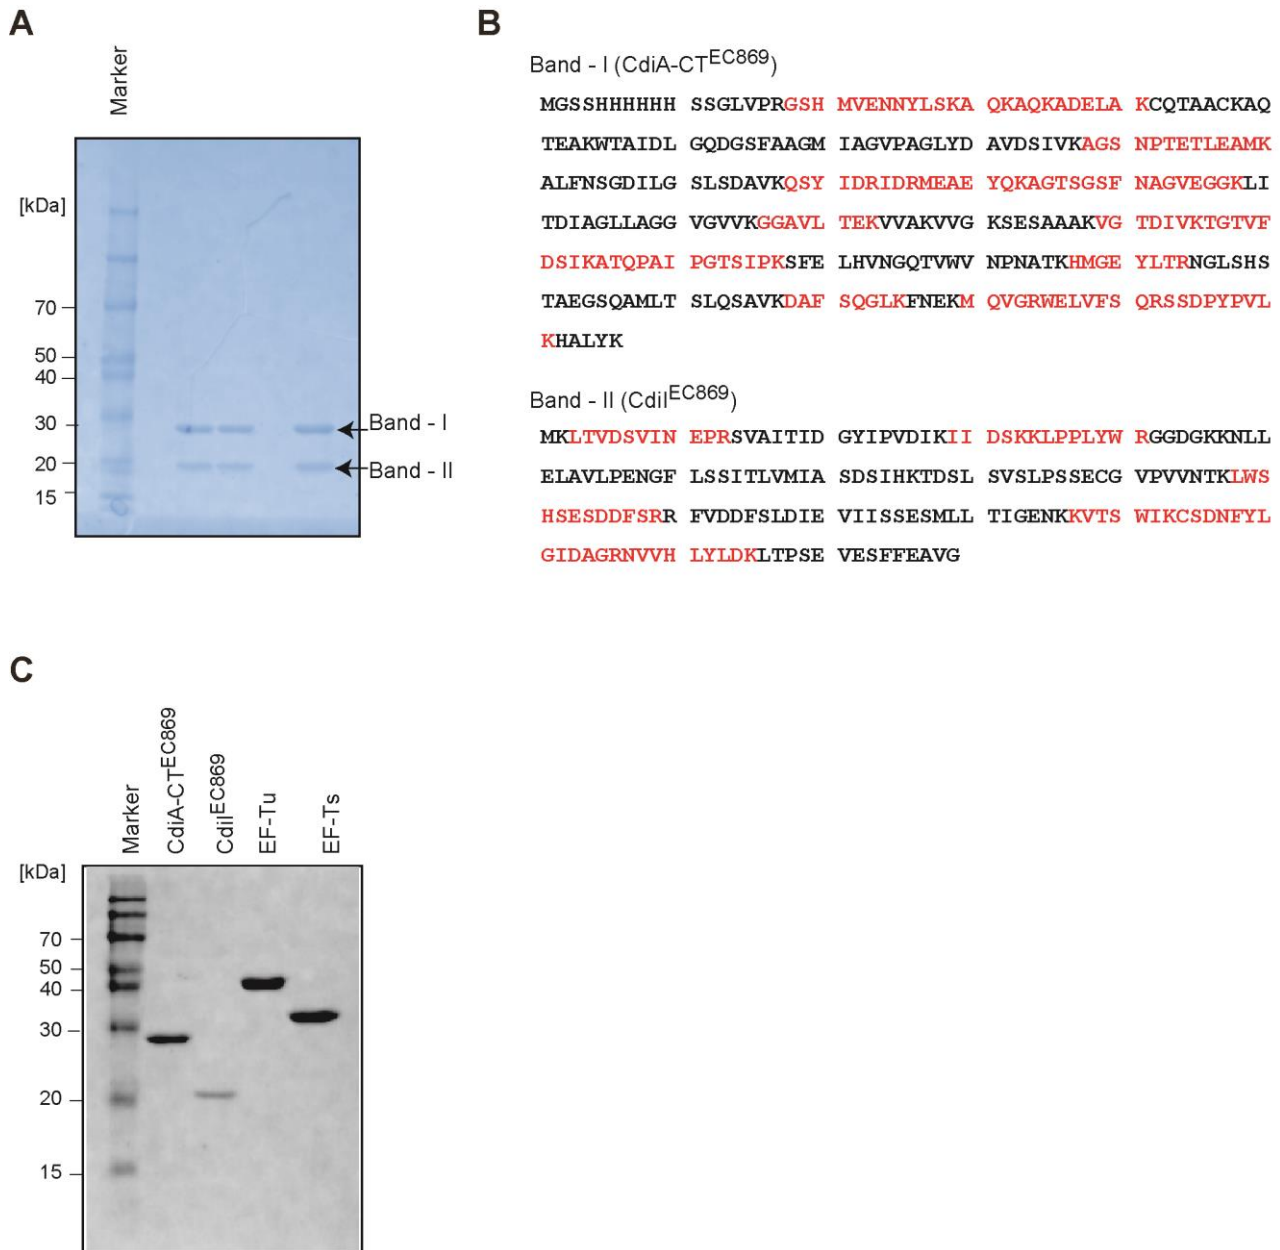

**Supplementary Figure S1: Purification of recombinant proteins.**

(A) Purification of the CdiA-CT<sup>EC869</sup>:CdiI<sup>EC869</sup> complex. After size-exclusion column chromatography, the fraction containing the CdiA-CT<sup>EC869</sup>:CdiI<sup>EC869</sup> complex was analyzed by electrophoresis on a 5–20% (w/v) SuperSep Ace gel (FujiFilm, Japan), which was stained with Quick-CBB Plus (Wako, Japan). Band-I and Band-II were digested with trypsin, and the peptides were analyzed by LC/MS, as described (1). (B) Peptides identified by LC/MS from the trypsin-digested Band-I and Band-II in (A) were mapped onto the amino acid sequences of recombinant CdiA-CT<sup>EC869</sup> and CdiI<sup>EC869</sup>, respectively. The amino acid sequences of recombinant CdiA-CT<sup>EC869</sup> and CdiI<sup>EC869</sup> are shown, and the identified peptide sequences are colored red. CdiI<sup>EC869</sup> was co-purified with histidine-tagged CdiA-CT<sup>EC869</sup>. (C) The purified Tu, Ts, CdiA-CT<sup>EC869</sup>, and CdiI<sup>EC869</sup> used for this study were separated by 15% (w/v) SDS PAGE, and the gel was stained with Coomassie Brilliant Blue.

**Figure S2**

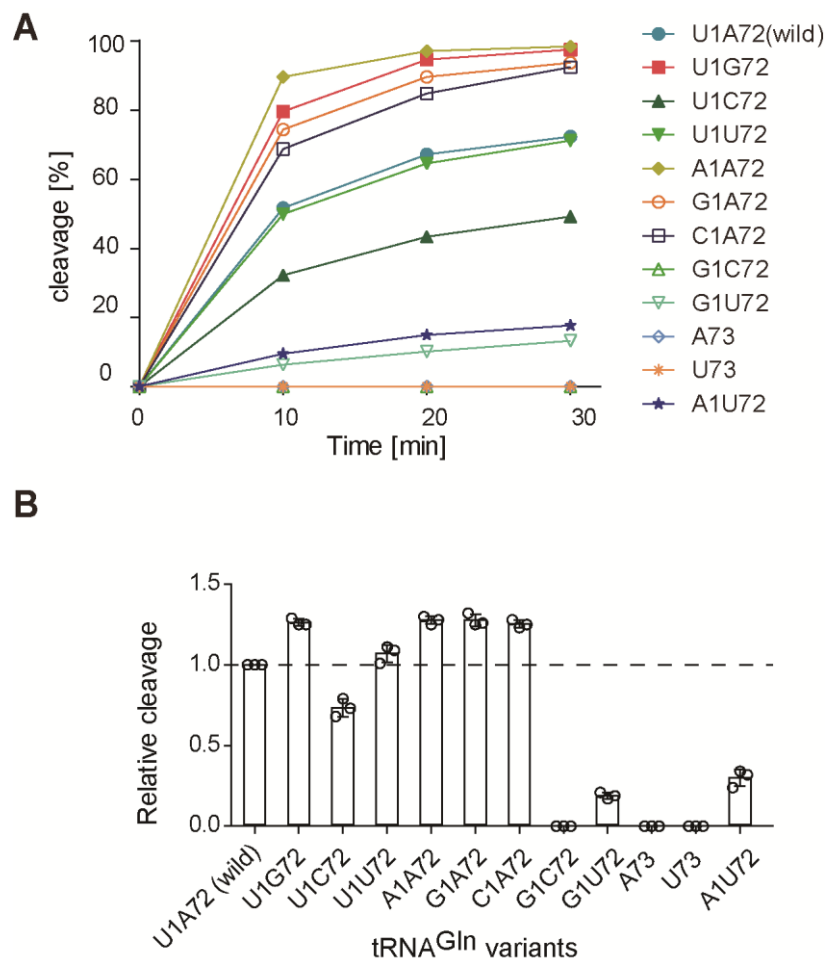

**Supplementary Figure S2: Cleavage of tRNA<sup>Gln</sup> variants by CdiA-CT<sup>EC869</sup> under acidic conditions.**

(A) Time course of cleavage of tRNA<sup>Gln</sup> variants by CdiA-CT<sup>EC869</sup> under lower-pH conditions (pH 5.7) in the absence of Tu, Ts, and GTP. The tRNA<sup>Gln</sup> variants (1.0  $\mu$ M) were incubated with 0.1  $\mu$ M of CdiA-CT<sup>EC869</sup> at 37°C. The fraction of cleaved tRNA was quantified at the indicated time points. (B) The cleavage of tRNA<sup>Gln</sup> variants by CdiA-CT<sup>EC869</sup> in the absence of Tu, Ts, and GTP. The tRNA<sup>Gln</sup> transcript variants (1.0  $\mu$ M) were incubated with 0.1  $\mu$ M of CdiA-CT<sup>EC869</sup> at 37°C for 10 min. The cleavage level of wild-type tRNA<sup>Gln</sup> (U1A72) was defined as 1.0. The bars in the graphs are SDs of more than three independent experiments, and the data are presented as mean values  $\pm$  SD.

**Figure S3**

| Amino Acid | Acc-stem  | D-stem  | D-loop        | D-stem | Ac-stem | Ac-loop  | Ac-stem             | V-region   | T-stem  | T-loop  | T-stem  | Acc-stem | CCA   |
|------------|-----------|---------|---------------|--------|---------|----------|---------------------|------------|---------|---------|---------|----------|-------|
|            | -1 1      | 8 10    | 14            | 22 26  | 27      | 32       | 39 44               |            | 49      | 53      | 61      | 66 73    | 74    |
| Asn_GTT    | - TCCTCTG | TA GTTC | AGTC--GGT--A  | GAAC G | GCGGA   | CTGTGTA  | TCCGT AT-----GTC    | ACTGG      | TTCGAGT | CCAGT   | CAGAGGA | G CCA    |       |
| Gln_CTG    | - TGGGGTA | TC GCCA | AGC--GGT--A   | AGGC A | CCGGA   | TTCGTAT  | TCCGG CA-----TTC    | CGAGG      | TTCGAAT | CCTCG   | TACCCCA | G CCA    |       |
| Gln_TTG    | - TGGGGTA | TC GCCA | AGC--GGT--A   | AGGC A | CCGGT   | TTTTGTAT | ACCGG CA-----TTC    | CCTGG      | TTCGAAT | CCAGG   | TACCCCA | G CCA    |       |
| Ini_CAT    | - CGCGGGG | TG GAGC | AGCCTGGT--A   | GCTC G | TCGGG   | CTCATAA  | CCCGA AG-----ATC    | GTCGG      | TTCAAAT | CCGGC   | CCCCGCA | A CCA    |       |
| Ini_CAT    | - CGCGGGG | TG GAGC | AGCCTGGT--A   | GCTC G | TCGGG   | CTCATAA  | CCCGA AG-----GTC    | GTCGG      | TTCAAAT | CCGGC   | CCCCGCA | A CCA    |       |
| Trp_CCA    | - AGGGGGG | TA GTTC | AATT--GGT--A  | GAGC A | CCGGT   | CTCCAAA  | ACCGG GT-----GTT    | GGGAG      | TTCGAGT | CTCTC   | CGCCCT  | G CCA    |       |
| Ala_GGC    | - GGGGCTA | TA GCTC | AGCT--GGG--A  | GAGC G | CTTGC   | ATGGCAT  | GCAAG AG-----GTC    | AGCGG      | TTCGATC | CCGCT   | TAGCTCC | A CCA    |       |
| Ala_TGC    | - GGGGCTA | TA GCTC | AGCT--GGG--A  | GAGC G | CCTGC   | TTTGCAC  | GCAGG AG-----GTC    | TGCGG      | TTCGATC | CCGCA   | TAGCTCC | A CCA    |       |
| Arg_ACG    | - GCATCCG | TA GCTC | AGCT--GGAT--A | GAGT A | CTCGG   | CTACGAA  | CCGAG CG-----GTC    | GGAGG      | TTCGAAT | CCTCC   | CGGATGC | A CCA    |       |
| Arg_CCG    | - GCGCCCG | TA GCTC | AGCT--GGAT--A | GAGC G | CTGCC   | CTCCGGA  | GCAGG AG-----GTC    | TCAGG      | TTCGAAT | CCTGT   | CGGGCGC | G CCA    |       |
| Arg_CCT    | - GTCCCTT | TA GTTA | AAT--GGAT--A  | TAAC G | AGCCC   | CTCTCAA  | GGGCT AA-----T-T    | GCAGG      | TTCGATT | CCTGC   | AGGGGAC | A CCA    |       |
| Arg_TCT    | - GCGCCCT | TA GCTC | AGTT--GGAT--A | GAGC A | ACGAC   | CTTCTAA  | GTCGT GG-----GCC    | GCAGG      | TTCGAAT | CTCG    | AGGGGAC | G CCA    |       |
| Asp_GTC    | - GGAGCGG | TA GTTC | AGTC--GGT--A  | GAAT A | CCTGC   | CTGTAC   | GCAGG GG-----GTC    | GCGGG      | TTCGAGT | CCCGT   | CCGTTCC | G CCA    |       |
| Cys_GCA    | - GCGCGGT | TA ACAA | AGC--GGT--T   | ATGT A | GCGGA   | TTGCAA   | TCCGT CT-----A-G    | TCCGG      | TTCGACT | CCGGA   | ACGGGCC | T CCA    |       |
| Glu_TTC    | - GTCCCTT | TC GTCT | AGA--GGCCCA   | GGAC A | CCGCC   | CTTTCAC  | GGCGG TA-----A-C    | AGGGG      | TTCGAAT | CCCTG   | AGGGGAC | G CCA    |       |
| Gly_CCC    | - GCGGGGG | TA GTTC | AAT--GGT--A   | GAAC G | AGAGC   | TTCCCAA  | GCTCT AT-----A-C    | GAGGG      | TTCGATT | CCCTT   | CGCCCGC | T CCA    |       |
| Gly_GCC    | - GCGGGAA | TA GCTC | AGTT--GGT--A  | GAGC A | CGACC   | TTGCCAA  | GGTCG GG-----GTC    | GCGAG      | TTCGATT | CTCTG   | TTCCCGC | T CCA    |       |
| Gly_TCC    | - GCGGGCA | TC GTAT | AAT--GGCT--A  | TTAC C | TCAGC   | CTTCCAA  | GCTGA TG-----A-T    | GCGGG      | TTCGATT | CCCGC   | TGCCCGC | T CCA    |       |
| His_GTG    | G GTGGCTA | TA GCTC | AGTT--GGT--A  | GAGC G | CTGGA   | TTGTGAT  | TCGAG TT-----GTC    | GTGGG      | TTCGAAT | CCCAT   | TGCCAC  | C CCA    |       |
| Ile_GAT    | - AGGCTTG | TA GCTC | AGGT--GGT--A  | GAGC G | CACCC   | CTGATAA  | GGGTG AG-----GTC    | GGTGG      | TTCGAAT | CCACT   | CAGGCTT | A CCA    |       |
| Ile_CAT    | - GGCCCTT | TA GCTC | AG--T--GGT--A | GAGC A | GGCGA   | CTCATAA  | TCGCT TG-----GTC    | GCTGG      | TTCGAAT | CCAGC   | AGGGGCC | A CCA    |       |
| Ile_CAT    | - GGCCCTT | TA GCTC | AG--T--GGT--A | GAGC A | GGCGA   | CTCATAA  | TCGCT TG-----GTC    | GCTGG      | TTCGAAT | CCAGC   | AAGGGCC | A CCA    |       |
| Leu_CAA    | - GCCGAAG | TG GCGA | AATC--GGTA--G | ACGC A | GTTGA   | TTCAAA   | TCACG TA-----GAAA   | TACGT      | GCCGG   | TTCGAGT | CCGGC   | CTTCGGC  | A CCA |
| Leu_CAG    | - GCGAAGG | TG GCGG | AATT--GGTA--G | ACGC G | CTAGC   | TTCAGGT  | GTTAG TGTTCT--TTAC  | GGAGG      | TTCGAAT | CCCCC   | CCCTCGC | A CCA    |       |
| Leu_CAG    | - GCGAAGG | TG GCGG | AATT--GGTA--G | ACGC G | CTAGC   | TTCAGGT  | GTTAG TGTTCT--TTAC  | GGAGG      | TTCGAAT | CCCCC   | CCCTCGC | A CCA    |       |
| Leu_GAG    | - GCGGAGG | TG GTGG | AATT--GGTA--G | ACAC G | CTACC   | TTGAGGT  | GGTAG TGCC--AATA    | GGGCTT     | ACGGG   | TTCGAAT | CCCGT   | CCTCGGT  | A CCA |
| Leu_TAA    | - GCCCGGA | TG GTGG | AATC--GGTA--G | ACAC A | AGGGA   | TTTAAA   | TCCTT CGCC--TTCC    | CGCTGT     | GCGGG   | TTCGAAT | CCCCC   | TCCGGGT  | A CCA |
| Leu_TAG    | - GCGGGAG | TG GCGA | AATC--GGTA--G | ACGC A | CCAGA   | TTTAGGT  | CTCTG GCCC--GCAA    | GGTGT      | GCGAG   | TTCGAAT | CTCGC   | CTCCCGC  | A CCA |
| Lys_TTT    | - GGTGCTG | TA GCTC | AGTT--GGT--A  | GAGC A | GTTGA   | CTTTTAA  | TCAAT TG-----GTC    | GCAGG      | TTCGAAT | CTTCG   | ACGACCC | A CCA    |       |
| Met_CAT    | - GGCCCTT | TA GCTC | AGT--GGT--A   | GAGC A | GGCGA   | CTCATAA  | TCGCT TG-----GTC    | GCTGG      | TTCGAAT | CCAGC   | AGGGGCC | A CCA    |       |
| Met_CAT    | - GGCCCTT | TA GCTC | AGT--GGT--A   | GAGC A | GGCGA   | CTCATAA  | TCGCT TG-----GTC    | GCTGG      | TTCGAAT | CCAGC   | AAGGGCC | A CCA    |       |
| Met_CAT    | - GGCTACG | TA GCTC | AGTT--GGT--A  | GAGC A | CATCA   | CTCATAA  | TGATG GG-----GTC    | ACAGG      | TTCGAAT | CCCGT   | CGTAGCC | A CCA    |       |
| Phe_GAA    | - GCCCGGA | TA GCTC | AGTC--GGT--A  | GAGC A | GGGGA   | TTGAAA   | TCCCG GT-----GTC    | CTTGG      | TTCGATT | CCGAG   | TCCGGGC | A CCA    |       |
| Pro_CGG    | - CGGTGAT | TG GCGC | AGCCTGGT--A   | GCGC A | CTTCG   | TTCGGGA  | CGAAG GG-----GTC    | GGAGG      | TTCGAAT | CCTCT   | ATCACCC | A CCA    |       |
| Pro_GGG    | - GCGCACG | TA GCGC | AGCCTGGT--A   | GCGC A | CCGTC   | ATGGGGT  | GTCGG GG-----GTC    | GGAGG      | TTCAAAT | CCTCT   | CGTGCCG | A CCA    |       |
| Pro_TGG    | - GCGCGAG | TA GCGC | AGCTTGGT--A   | GCGC A | ACTGG   | TTTGGGA  | CCAGT GG-----GTC    | GGAGG      | TTCGAAT | CCTCT   | CTCGCCG | A CCA    |       |
| Ser_CGA    | - GGAGAGA | TG CCGG | AGC--GGCTGA   | ACGG A | CCGCT   | CTCGAAA  | ACCGG AGTAGGG--GCAA | CTCTAC-C   | GGGGG   | TTCAAAT | CCCCC   | TCTCTCC  | G CCA |
| Ser_GCT    | - GGTGAGG | TG GCGG | AGA--GGCTGA   | AGGC G | CTCCG   | CTGCTAA  | GGGAG TATGCGGTCAA   | AGCTGCAT-C | CGGGG   | TTCGAAT | CCCCC   | CTCACC   | G CCA |
| Ser_GGA    | - GGTGAGG | TG TCCG | AGT--GGCTGA   | AGGA G | CACCG   | CTGGAAA  | GTGTG TATACG--GCAA  | CGTAT-C    | GGGGG   | TTCGAAT | CCCCC   | CCTCACC  | G CCA |
| Ser_TGA    | - GGAAGTG | TG GCGG | AGC--GGTGA    | AGGC A | CCGGT   | CTTGAAA  | ACCGG CGACCC--GAAA  | GGGTT-C    | CAGAG   | TTCGAAT | CTCTG   | CGTTTCC  | G CCA |
| Thr_CGT    | - GCTCAAG | TA GTTA | AAAA--TGCA--T | TAAC A | TCGCA   | TTCGTAA  | TGCGA AG-----GTC    | GTAGG      | TTCGACT | CCTAT   | TATCGGC | A CCA    |       |
| Thr_CGT    | - GCCGATA | TA GCTC | AGTT--GGT--A  | GAGC A | GCGCA   | TTCGTAA  | TGCGA AG-----GTC    | GTAGG      | TTCGACT | CCTAT   | TATCGGC | A CCA    |       |
| Thr_GGT    | - GCTGATA | TG GCTC | AGTT--GGT--A  | GAGC G | CACCC   | TTGGTAA  | GGGTG AG-----GTC    | CCCAG      | TTCGACT | CTGGG   | TATCAGC | A CCA    |       |
| Thr_GGT    | - GCTGATA | TA GCTC | AGTT--GGT--A  | GAGC G | CACCC   | TTGGTAA  | GGGTG AG-----GTC    | GGCAG      | TTCGAAT | CTGCC   | TATCAGC | A CCA    |       |
| Thr_TGT    | - GCCGACT | TA GCTC | AGTA--GGT--A  | GAGC A | ACTGA   | CTTGTA   | TCAGT AG-----GTC    | ACCAG      | TTCGATT | CCGGT   | AGTCGGC | A CCA    |       |
| Tyr_GTA    | - GGTGGGG | TT CCCC | AGC--GGCCAA   | AGGG A | GCAGA   | CTGTAAA  | TCTGC CGTC--ATCG    | ACTTC      | GAAGG   | TTCGAAT | CCTTC   | CCCCACC  | A CCA |
| Tyr_GTA    | - GGTGGGG | TT CCCC | AGC--GGCCAA   | AGGG A | GCAGA   | CTGTAAA  | TCTGC CGTC--ACAG    | ACTTC      | GAAGG   | TTCGAAT | CCTTC   | CCCCACC  | A CCA |
| Val_GAC    | - GCGTTC  | TA GCTC | AGTT--GGT--A  | GAGC A | CCACC   | TTGACAT  | GGTGG GG-----GTC    | GTTGG      | TTCGAGT | CCAAT   | TGAACGC | A CCA    |       |
| Val_GAC    | - GCGTTC  | TA GCTC | AGTT--GGT--A  | GAGC A | CCACC   | TTGACAT  | GGTGG GG-----GTC    | GTTGG      | TTCGAGT | CCAAT   | TGAACGC | A CCA    |       |
| Val_TAC    | - GGGTGT  | TA GCTC | AGCT--GGG--A  | GAGC A | CCTCC   | CTTACAA  | GGAGG GG-----GTC    | GGCGG      | TTCGATC | CCGTC   | ATCACCC | A CCA    |       |

**Supplementary Figure S3: Sequence alignments of *E. coli* tRNA genes (2).**

**Figure S4**

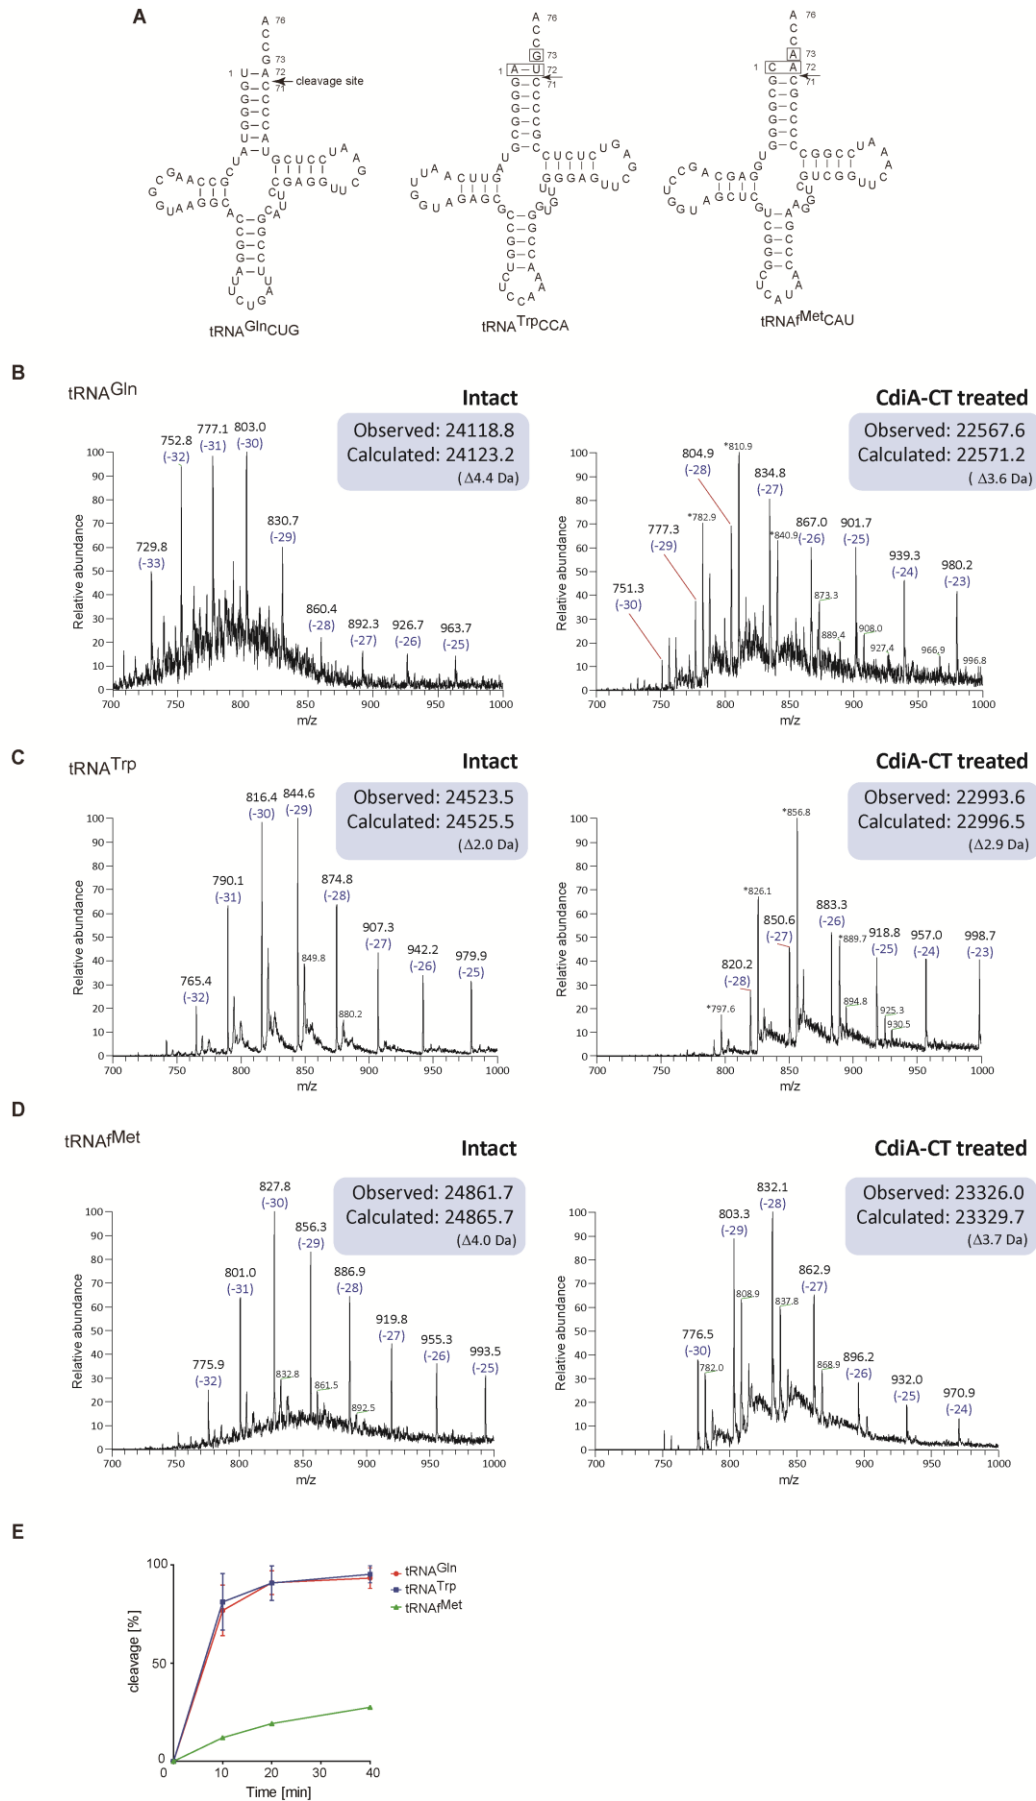

**Supplementary Figure S4: Cleavage sites in tRNA<sup>fMet</sup> and tRNA<sup>Trp</sup> by CdiA-CT<sup>EC869</sup> *in vitro*.**

(A) Clover-leaf structures of *E. coli* tRNA<sup>Gln</sup>CUG, tRNA<sup>Trp</sup>CCA, and tRNA<sup>fMet</sup>CAU. Cleavage sites in tRNAs are indicated by arrows. (B)-(D) Whole-mass analysis of CdiA-CT-treated tRNAs for Gln (B), Trp (C), and fMet (D). After tRNA cleavage by CdiA-CT in the presence of Tu, Ts and GTP, the cleaved products were separated by PAGE, purified, and analyzed. Left and right panels show ESI-MS of intact and CdiA-CT-treated tRNAs, respectively. A series of multiply charged negative ions (black) with charge values (blue) are shown in each mass spectrum. The deconvoluted molecular mass (Observed) and calculated value (Calculated) are shown in the inset. MS peaks of HFIP adducts are asterisked. The molecular mass reductions of tRNAs upon CdiA treatment indicated that these tRNAs are cleaved between positions 71 and 72, yielding terminal 2'-3' cyclic phosphate ends. (E) Time courses of the cleavage of tRNA<sup>Trp</sup> and tRNA<sup>fMet</sup> by CdiA-CT<sup>EC869</sup> in the presence of Tu, Ts, and GTP at pH 7.4. The tRNAs (1.0  $\mu$ M) were incubated with 0.6  $\mu$ M of CdiA-CT<sup>EC869</sup> at 37°C in the presence of 0.6  $\mu$ M Tu, 0.6  $\mu$ M Ts, and 1 mM GTP. The fraction of each cleaved tRNA was quantified at the indicated time points. The bars in the graphs are SDs of more than three independent experiments.

**Figure S5**

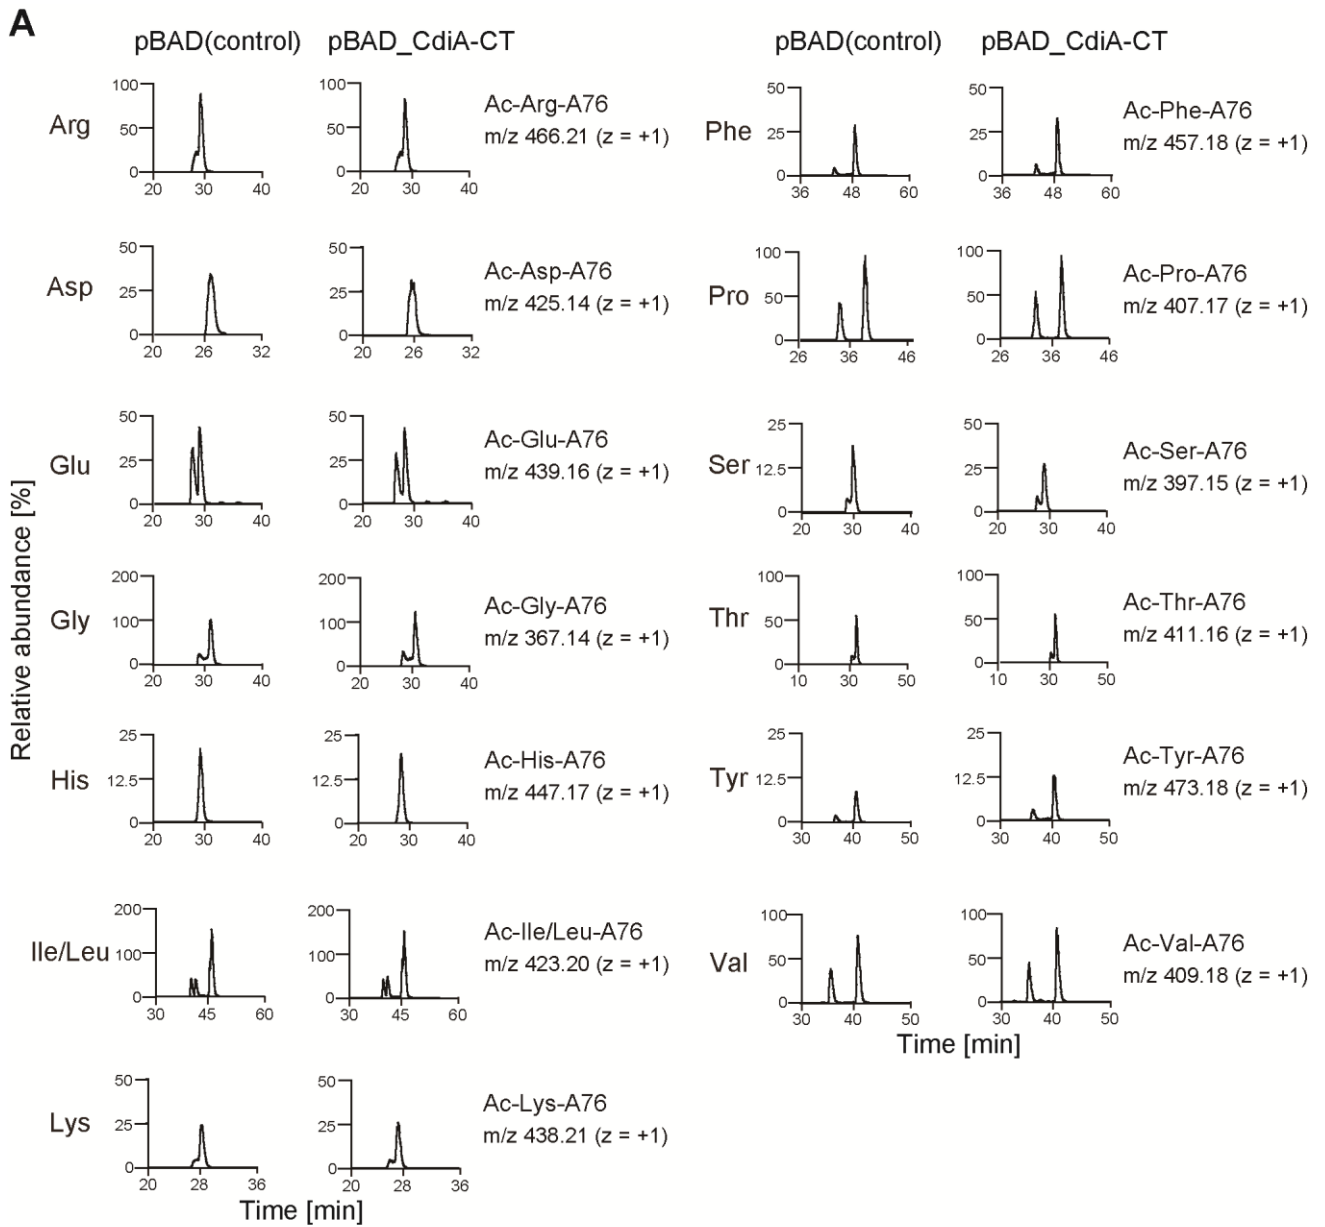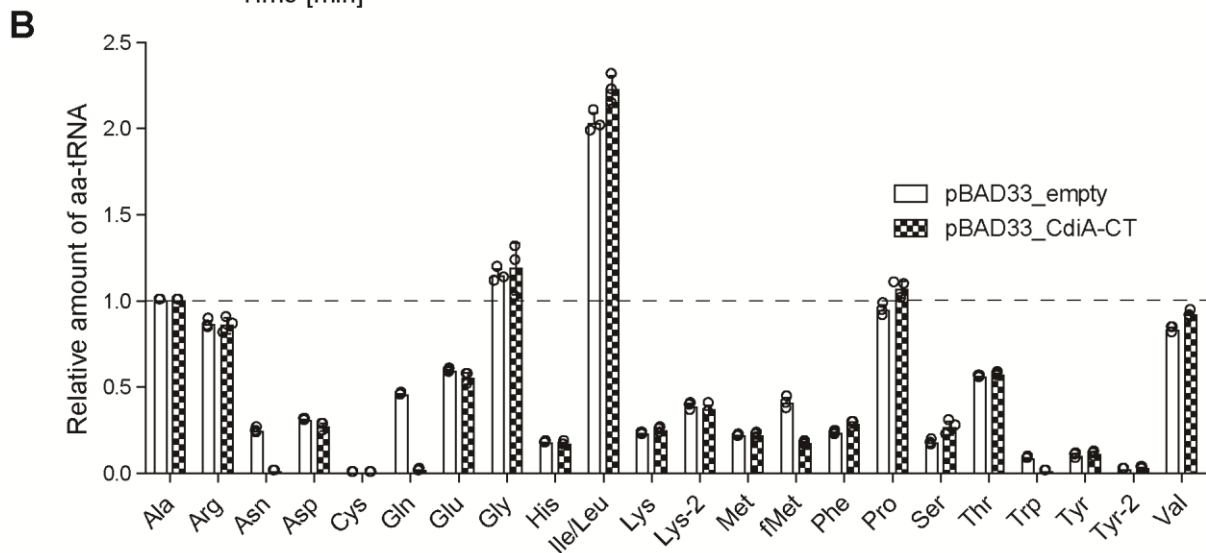

**Supplementary Figure S5: Changes of aa-tRNA levels after CdiA-CT<sup>EC869</sup> expression.**

(A) LC/MS analyses of RNase I-digested RNAs prepared from *E. coli* with or without CdiA-CT<sup>EC869</sup> induction. The amount of each Ac-aa-A76 derived from the aminoacyl-tRNA prepared from cells, with or without induction of CdiA-CT<sup>EC869</sup>, is expressed relative to the amount of Ac-Ala-A76 in each cell, with or without induction of CdiA-CT<sup>EC869</sup>, respectively. (B) Quantification of relative amounts of each aa-tRNA (or formyl-Met-tRNA<sup>Met</sup>: fMet) in *E. coli* with (pBAD33\_CdiA-CT) or without (pBAD33\_empty) induction of CdiA-CT<sup>EC869</sup>. The amount of Ala-tRNA<sup>Ala</sup> in each cell with or without CdiA-CT<sup>EC869</sup> induction was set to 1.0. Lys-2 and Tyr-2 correspond to the products acetylated at the amino group and hydroxy group of the side chains, respectively, in addition to the  $\alpha$ -amino groups. The bars in the graphs are SDs of more than three independent experiments.



**Figure S6**

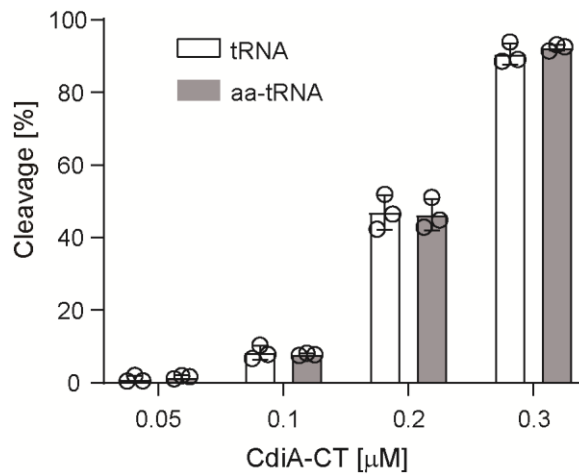

**Supplementary Figure S6: Uncharged- and aminoacylated-tRNAs are cleaved by CdiA-CT<sup>EC869</sup> in the presence of translation factors.**

tRNA<sup>Gln</sup> (tRNA, open box) and Gln-tRNA<sup>Gln</sup> (aa-tRNA, closed box) cleavage by CdiA-CT<sup>EC869</sup> in the presence of Tu, Ts, and GTP at 37°C. For cleavage of Gln-tRNA<sup>Gln</sup>, 1.0 μM tRNA<sup>Gln</sup> was first aminoacylated by GlnRS (1.0 μM) for 60 min in buffer containing 20 mM Tris-Cl, pH 7.4, 150 mM KCl, 5 mM MgCl<sub>2</sub>, 10 mM β-mercaptoethanol, 4 mM ATP, and 200 μM glutamine, and was then cleaved by increasing amounts of CdiA-CT<sup>EC869</sup> (0.05, 0.1, 0.2, and 0.3 μM), in the presence of translation factors (0.05, 0.1, 0.2, and 0.3 μM each) and GTP (1 mM) for 10 min. The tRNA cleavage levels were quantified. The bars in the graphs are SDs of more than three independent experiments.

**Figure S7**

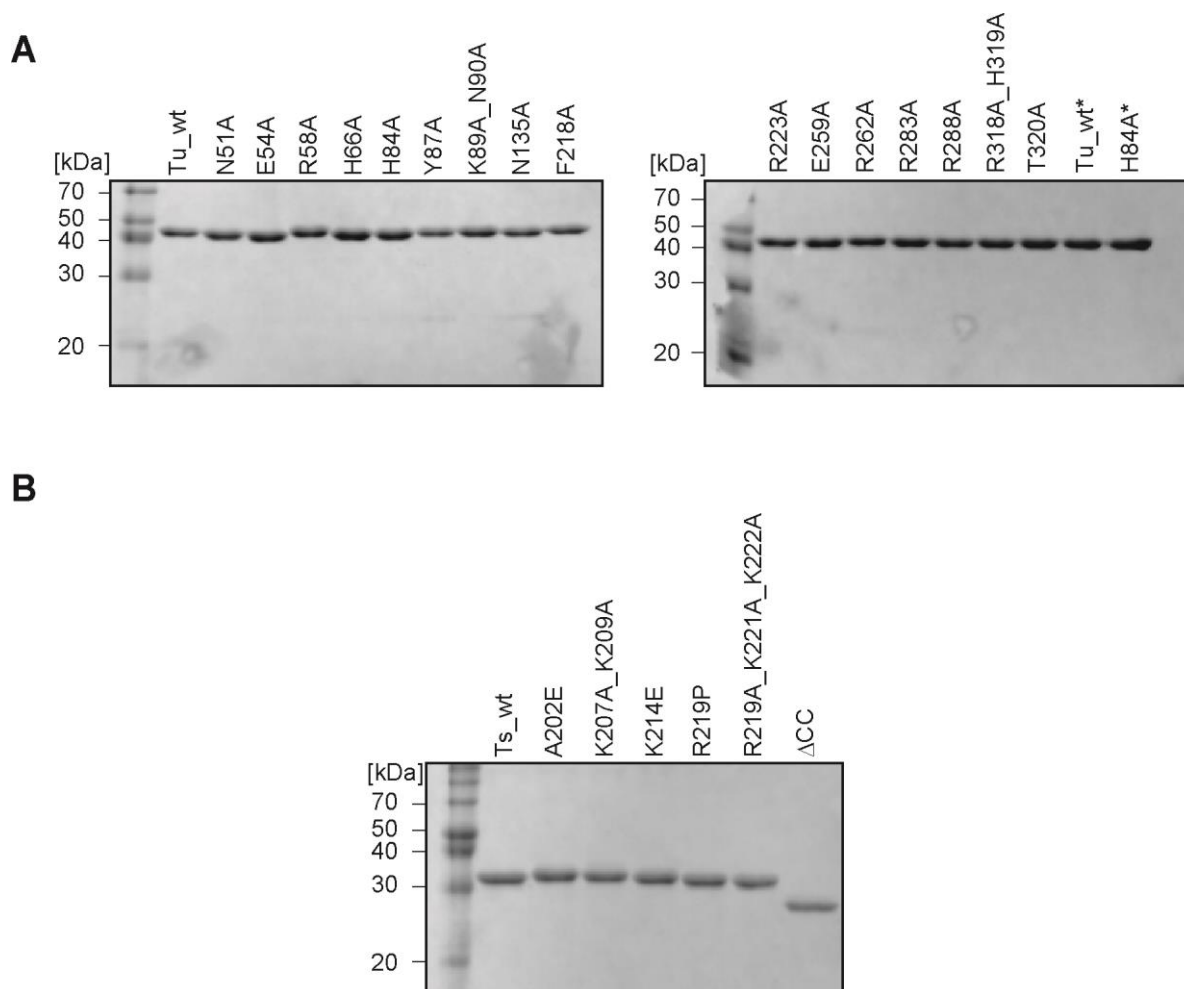

**Supplementary Figure S7: Purification of Tu and Ts variants used in this study.**

(A) Tu variants and (B) Ts variants were separated by 15% (w/v) SDS PAGE, and the gels were stained with Coomassie Brilliant Blue. Tu\_wt\* and H84A\* in (A) were purified as previously described (3).

**Figure S8**

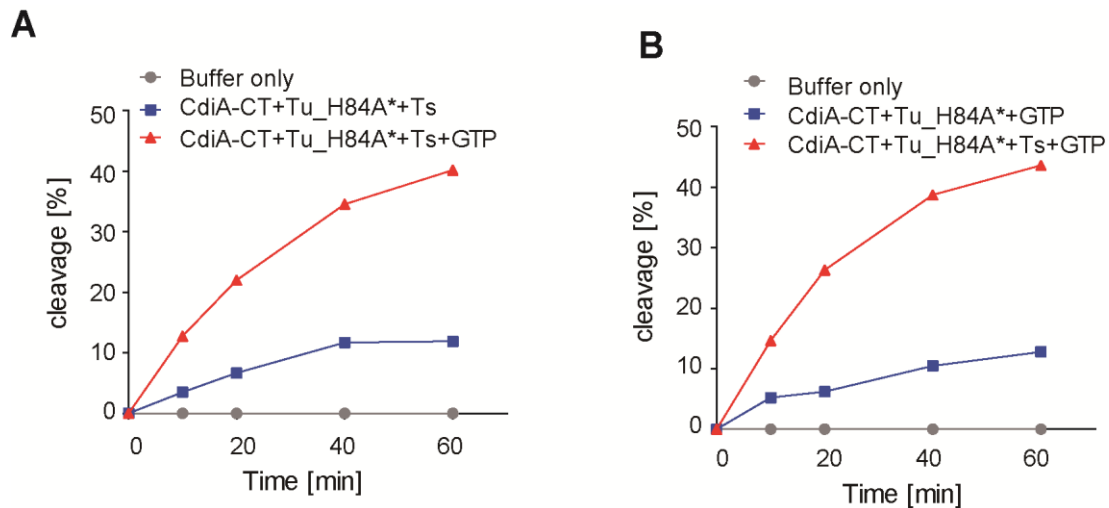

**Supplementary Figure S8: The role of Tu\_H84A in the enhancement of tRNA cleavage by CdiA-CT<sup>EC869</sup>.**

(A) GTP requirement for the enhancement of tRNA cleavage by CdiA-CT<sup>EC869</sup> in the presence of Tu\_H84A and Ts. The tRNA<sup>Gln</sup> transcript (1.0  $\mu$ M) was incubated at 37°C with 0.1  $\mu$ M of CdiA-CT<sup>EC869</sup> in the presence of Tu\_H84A (0.1  $\mu$ M) and Ts (0.1  $\mu$ M) with or without GTP (1 mM). (B) Ts requirement for the enhancement of tRNA cleavage by CdiA-CT<sup>EC869</sup> in the presence of Tu\_H84A and GTP. The tRNA<sup>Gln</sup> transcript (1.0  $\mu$ M) was incubated at 37°C with 0.1  $\mu$ M of CdiA-CT<sup>EC869</sup> in the presence of Tu\_H84A (0.1  $\mu$ M) and GTP (1 mM), with or without Ts (0.1  $\mu$ M).

**Figure S9**

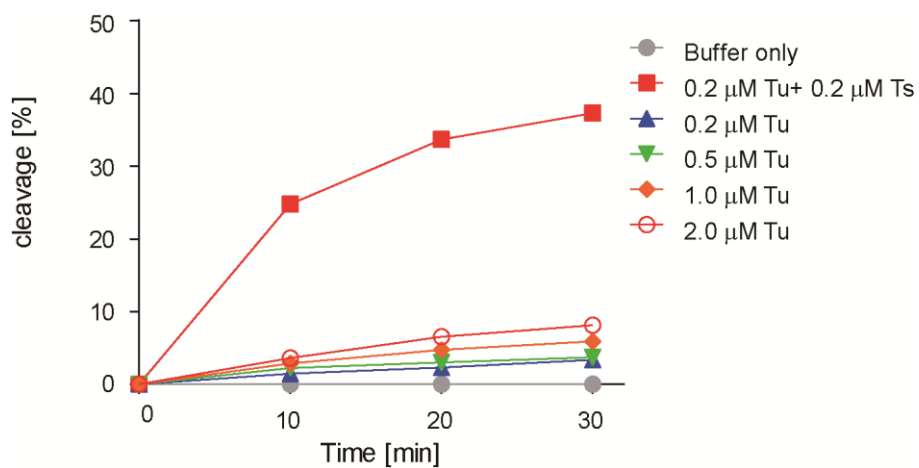

**Supplementary Figure S9: Excess Tu does not compensate for the absence of Ts.**

Cleavage of tRNA<sup>Gln</sup> by CdiA-CT<sup>EC869</sup> in the presence of increasing amounts of Tu and GTP, in the absence of Ts. The tRNA<sup>Gln</sup> transcript (1.0 μM) was incubated at 37°C with 0.2 μM of CdiA-CT<sup>EC869</sup> in the presence of Tu (0.2–2.0 μM) and GTP (1 mM). Addition of 0.2 μM Ts promoted cleavage of tRNA<sup>Gln</sup> at pH 7.4.

**Figure S10**

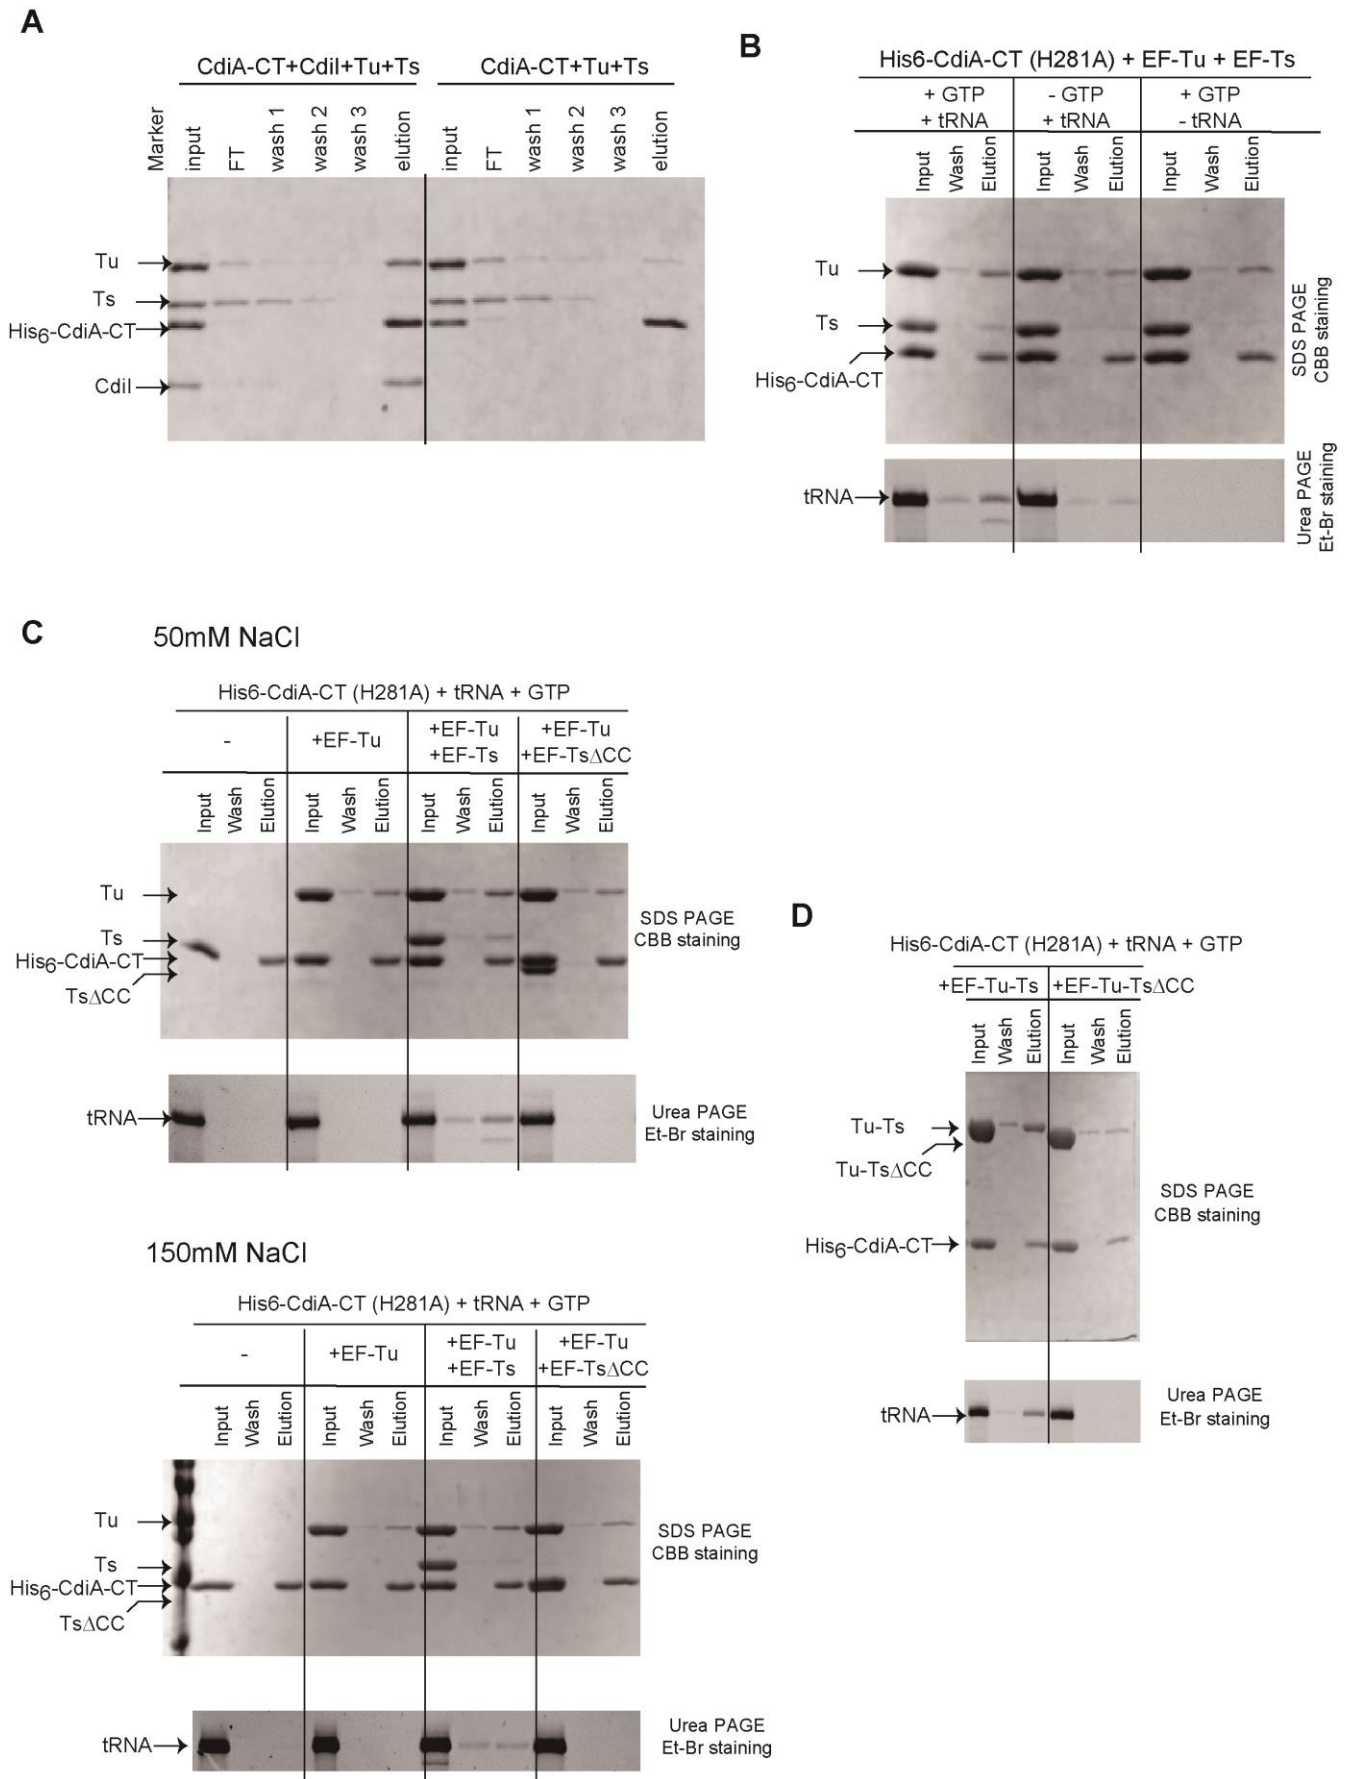

**Supplementary Figure S10: Interaction between CdiA-CT<sup>EC869</sup> and Tu, Ts, and tRNA.**

(A) Histidine-tagged CdiA-CT<sup>EC869</sup> (5  $\mu$ M, His<sub>6</sub>-CdiA-CT) was mixed with equal amounts of Tu and Ts (and CdiI<sup>EC869</sup>) in 200  $\mu$ l of A-buffer, containing 20 mM Tris-Cl, pH 7.0, 150 mM NaCl, 5 mM  $\beta$ -mercaptoethanol, and 20 mM imidazole (input), and the mixture was loaded onto Ni-NTA resin (150  $\mu$ l) in a Poly-Prep chromatography column (Bio-Rad, Japan). The flow-through (FT) was collected, and the Ni-NTA was washed three times with 500  $\mu$ l of A-buffer (washes 1, 2, and 3). His<sub>6</sub>-CdiA-CT was eluted from the resin with 200  $\mu$ l of buffer, containing 20 mM Tris-Cl, pH 7.0, 150 mM NaCl, 5 mM  $\beta$ -mercaptoethanol, and 500 mM imidazole (elution). The samples were separated by 15% (w/v) SDS-PAGE and the gel was stained with Coomassie Brilliant Blue. (B) His-tagged CdiA-CT(H281A) was mixed with Tu and Ts in the presence or absence of tRNA or GTP, and the mixture was loaded onto a Ni-NTA column. The column was washed, and finally, CdiA-CT was eluted from the column. Proteins were visualized by SDS-PAGE and staining with CBB, and tRNA was visualized by PAGE and staining with ethidium bromide as in Figure 5G. (C) His-tagged CdiA-CT(H281A) was mixed with Tu or Tu and Ts (or Ts $\Delta$ ACC) in the presence of tRNA and GTP under two different salt conditions (upper panel: 50 mM NaCl and lower panel: 150 mM NaCl), and the mixture was loaded onto a Ni-NTA column. The column was washed, and finally, CdiA-CT was eluted from the column as in (B). (D) His-tagged CdiA-CT(H281A) was mixed with sg-Tu-Ts (or sgEF-Tu-Ts $\Delta$ ACC) in the presence of tRNA and GTP. The column was washed, and finally, CdiA-CT was eluted from the column as in (B). For the experiments in (B)-(D), we used catalytically inactive CdiA-CT with H281A mutation, CdiA-CT (H281A), instead of using wild-type CdiA-CT, because tRNA could be cleaved during the pre-incubation of tRNA with wild-type CdiA-CT.

**Figure S11**

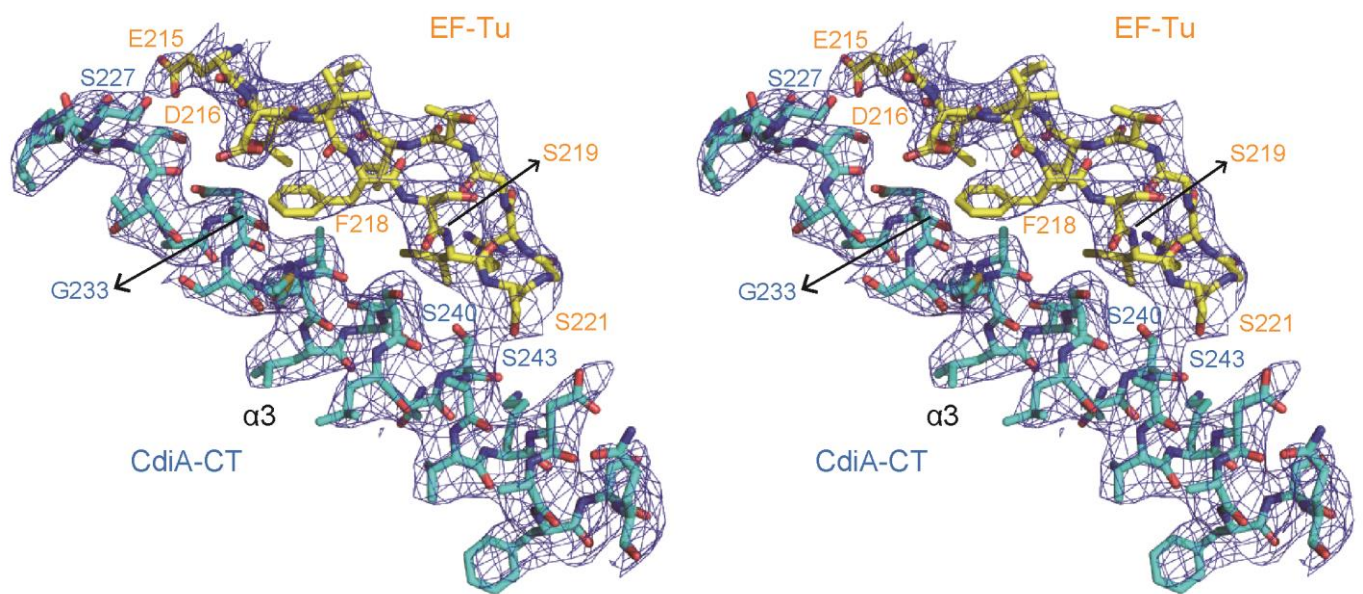

**Supplementary Figure S11: Electron density map.**

Stereoviews of the  $2mF_o-DFc$  electron densities of the residues around the CdiA-CT and Tu interface are shown in blue contoured at  $1.0 \sigma$ .

**Figure S12**

**A**

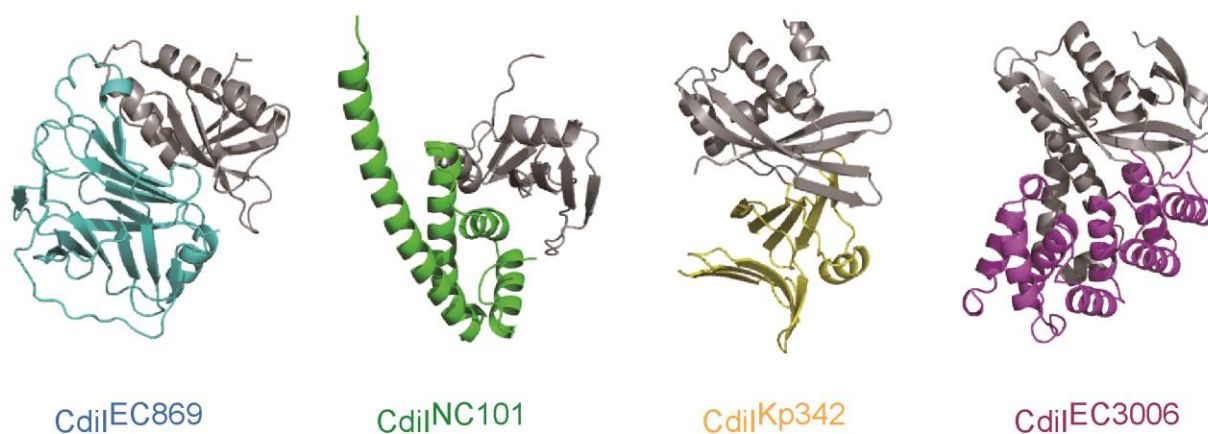

**B**

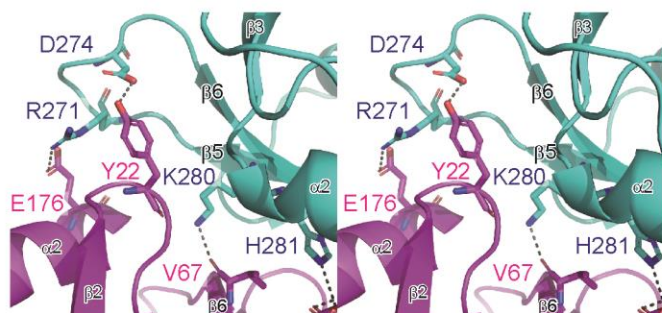

**C**

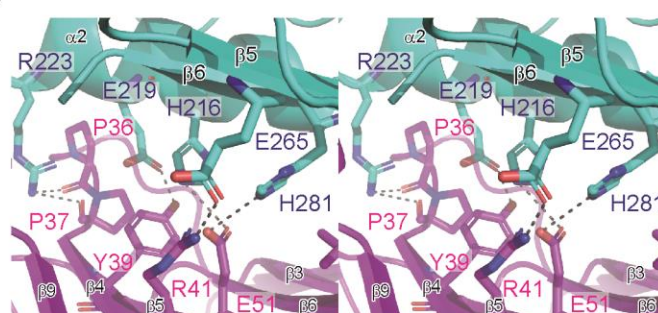

**D**

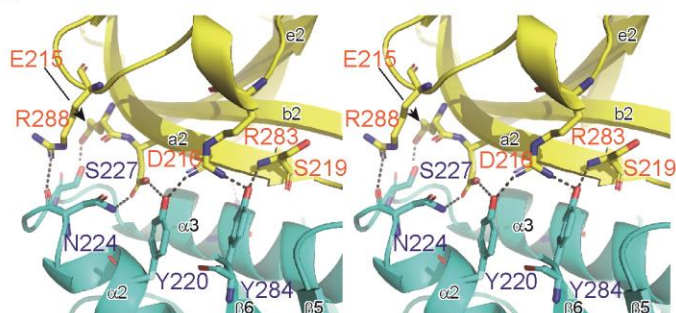

**E**

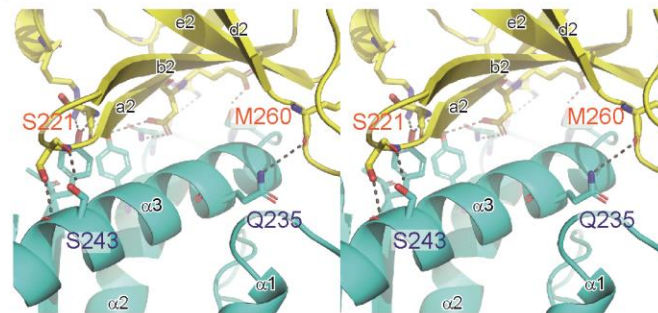

**Supplementary Figure S12:** (A) Structural comparison of CdiA-CT:CdiI complexes from *E. coli* EC869 (cyan), NC101 (green) (4), *Klebsiella pneumoniae* 342 (yellow) (5), and *E. coli* EC3006 (magenta) (5). For clarity, CdiA-CTs are colored in gray. (B, C) Interactions between CdiA-CT<sup>EC869</sup> (cyan) and CdiI<sup>EC869</sup> (magenta). (D, E) Interactions between CdiA-CT<sup>EC869</sup> (cyan) and domain II of Tu (yellow). Tu secondary structure elements are labeled according to the literature (6).



**Figure S13**

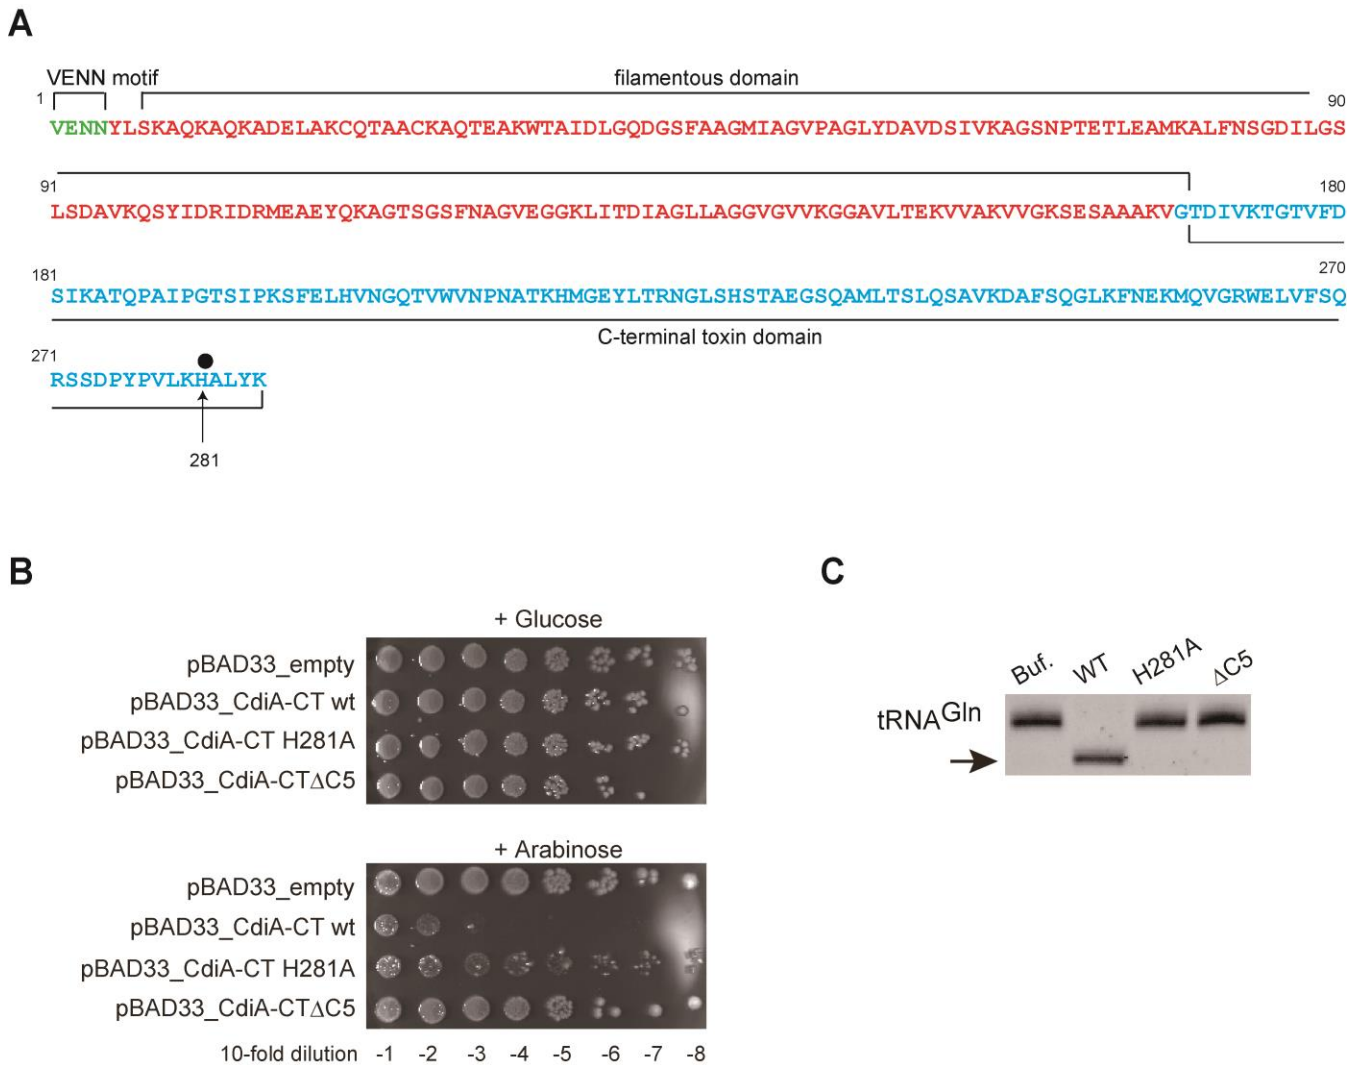

**Supplementary Figure S13: CdiA-CT<sup>EC869</sup> variants with reduced toxicity and tRNase activity.**

(A) Amino acid sequence of CdiA-CT<sup>EC869</sup>. The VENN motif (green), filamentous domain (red) and toxin domain (cyan) of CdiA-CT<sup>EC869</sup> are depicted. (B) The cytotoxic activity of CdiA-CT<sup>EC869</sup> is reduced by the His281Ala mutation (H281A) or deletion of five C-terminal amino acid residues ( $\Delta$ C5). Overnight cultures of *E. coli* MG1655 transformed with pBAD33\_CdiA-CT<sup>EC869</sup>, pBAD33\_CdiA-CT<sup>EC869</sup>\_H281A, and pBAD33\_CdiA-CT<sup>EC869</sup>\_ $\Delta$ C5 were serially diluted, and the dilutions were spotted on LB agar plates containing 50  $\mu$ g/ml chloramphenicol supplemented with 1% (w/v) arabinose (lower panel) or 1% (w/v) glucose (upper panel). (C) The His281Ala mutation (H281A) or deletion of the C-terminal five amino acids ( $\Delta$ C5) decreased tRNA cleavage activity *in vitro*. Reactions were performed in the presence of Tu, Ts, and GTP, and the tRNA<sup>Gln</sup> transcript was used as the substrate. The tRNA<sup>Gln</sup> transcript (1.0  $\mu$ M) was incubated at 37°C for 10 min with 0.5  $\mu$ M of CdiA-CT<sup>EC869</sup> or its variants in the presence of Tu (0.5  $\mu$ M), Ts (0.5  $\mu$ M), and GTP (1 mM). The arrow indicates tRNA<sup>Gln</sup> cleaved by CdiA-CT<sup>EC869</sup>.

## Supplementary Table S1

### Nucleotide sequences of the synthetic *E. coli* tRNAs and CdiA-CT/CdiI<sup>EC869</sup> genes

| Gene                           | Nucleotide sequence                                                                                                                                                 |
|--------------------------------|---------------------------------------------------------------------------------------------------------------------------------------------------------------------|
| tRNA <sup>Gln</sup> U1A72 (wt) | 5'-<br>gaattcTAATACGACTCACTATAGGGAGACCACAACGGTTTCCCTCTAGATGG<br>GGTATCGCCAAGCGGTAAGGCACCGGATTCTGATTCCGGCATTCCGAGGTT<br>CGAATCCTCGTACCCCAGCCAggctagctaCATCCAAGCTT-3' |
| tRNA <sup>Gln</sup> U1G72      | 5'-<br>gaattcTAATACGACTCACTATAGGGAGACCACAACGGTTTCCCTCTAGATGG<br>GGTATCGCCAAGCGGTAAGGCACCGGATTCTGATTCCGGCATTCCGAGGTT<br>CGAATCCTCGTACCCCAGCCAggctagctaCATCCAAGCTT-3' |
| tRNA <sup>Gln</sup> U1C72      | 5'-<br>gaattcTAATACGACTCACTATAGGGAGACCACAACGGTTTCCCTCTAGATGG<br>GGTATCGCCAAGCGGTAAGGCACCGGATTCTGATTCCGGCATTCCGAGGTT<br>CGAATCCTCGTACCCCAGCCAggctagctaCATCCAAGCTT-3' |
| tRNA <sup>Gln</sup> U1U72      | 5'-<br>gaattcTAATACGACTCACTATAGGGAGACCACAACGGTTTCCCTCTAGATGG<br>GGTATCGCCAAGCGGTAAGGCACCGGATTCTGATTCCGGCATTCCGAGGTT<br>CGAATCCTCGTACCCCAGCCAggctagctaCATCCAAGCTT-3' |
| tRNA <sup>Gln</sup> A1A72      | 5'-<br>gaattcTAATACGACTCACTATAGGGAGACCACAACGGTTTCCCTCTAGAAGG<br>GGTATCGCCAAGCGGTAAGGCACCGGATTCTGATTCCGGCATTCCGAGGTT<br>CGAATCCTCGTACCCCAGCCAggctagctaCATCCAAGCTT-3' |
| tRNA <sup>Gln</sup> G1A72      | 5'-<br>gaattcTAATACGACTCACTATAGGGAGACCACAACGGTTTCCCTCTAGAGGG<br>GGTATCGCCAAGCGGTAAGGCACCGGATTCTGATTCCGGCATTCCGAGGTT<br>CGAATCCTCGTACCCCAGCCAggctagctaCATCCAAGCTT-3' |
| tRNA <sup>Gln</sup> C1A72      | 5'-<br>gaattcTAATACGACTCACTATAGGGAGACCACAACGGTTTCCCTCTAGACGG<br>GGTATCGCCAAGCGGTAAGGCACCGGATTCTGATTCCGGCATTCCGAGGTT<br>CGAATCCTCGTACCCCAGCCAggctagctaCATCCAAGCTT-3' |
| tRNA <sup>Gln</sup> A1U72      | 5'-<br>gaattcTAATACGACTCACTATAGGGAGACCACAACGGTTTCCCTCTAGAAGG<br>GGTATCGCCAAGCGGTAAGGCACCGGATTCTGATTCCGGCATTCCGAGGTT<br>CGAATCCTCGTACCCCAGCCAggctagctaCATCCAAGCTT-3' |
| tRNA <sup>Gln</sup> G1C72      | 5'-<br>gaattcTAATACGACTCACTATAGGGAGACCACAACGGTTTCCCTCTAGAGGG                                                                                                        |

|                                                                                                                                          |                                                                                                                                                                                                                                                                                                                                                                                                                                                                                                                                                                                                                                                                                                                                                                                                                                                                                                                                                                                                                                                                                                                                                                                                                                                                                                                                                                                                                          |
|------------------------------------------------------------------------------------------------------------------------------------------|--------------------------------------------------------------------------------------------------------------------------------------------------------------------------------------------------------------------------------------------------------------------------------------------------------------------------------------------------------------------------------------------------------------------------------------------------------------------------------------------------------------------------------------------------------------------------------------------------------------------------------------------------------------------------------------------------------------------------------------------------------------------------------------------------------------------------------------------------------------------------------------------------------------------------------------------------------------------------------------------------------------------------------------------------------------------------------------------------------------------------------------------------------------------------------------------------------------------------------------------------------------------------------------------------------------------------------------------------------------------------------------------------------------------------|
|                                                                                                                                          | GGTATCGCCAAGCGGTAAGGCACCGGATTCTGATTCCGGCATTCCGAGGTT<br>CGAATCCTCGTACCCCCGCCAggctagctaCATCCAAGCTT-3'                                                                                                                                                                                                                                                                                                                                                                                                                                                                                                                                                                                                                                                                                                                                                                                                                                                                                                                                                                                                                                                                                                                                                                                                                                                                                                                      |
| tRNA <sup>Gln</sup> A73                                                                                                                  | 5'-<br>gaattcTAATACGACTCACTATAGGGAGACCACAACGGTTTCCCTCTAGATGG<br>GGTATCGCCAAGCGGTAAGGCACCGGATTCTGATTCCGGCATTCCGAGGTT<br>CGAATCCTCGTACCCAACCAggctagctaCATCCAAGCTT-3'                                                                                                                                                                                                                                                                                                                                                                                                                                                                                                                                                                                                                                                                                                                                                                                                                                                                                                                                                                                                                                                                                                                                                                                                                                                       |
| tRNA <sup>Gln</sup> U73                                                                                                                  | 5'-<br>gaattcTAATACGACTCACTATAGGGAGACCACAACGGTTTCCCTCTAGATGG<br>GGTATCGCCAAGCGGTAAGGCACCGGATTCTGATTCCGGCATTCCGAGGTT<br>CGAATCCTCGTACCCCATCCAaggctagctaCATCCAAGCTT-3'                                                                                                                                                                                                                                                                                                                                                                                                                                                                                                                                                                                                                                                                                                                                                                                                                                                                                                                                                                                                                                                                                                                                                                                                                                                     |
| tRNA <sup>Trp</sup>                                                                                                                      | 5'-<br>GAATTCTAATACGACTCACTATAGGGAGACCACAACGGTTTCCCTCTAGAA<br>GGGGCGTAGTTCAATTGGTAGAGCACCGGTCTCCAAAACCGGGTGTGGGA<br>GTTTCGAGTCTCTCCGCCCTGCCAGGCTAGCTACATCCAAGCTT-3'                                                                                                                                                                                                                                                                                                                                                                                                                                                                                                                                                                                                                                                                                                                                                                                                                                                                                                                                                                                                                                                                                                                                                                                                                                                      |
| CdiA-CT <sup>EC869</sup> (amino acid residues 1–286) and Cdi <sup>EC869</sup> (blue letters; amino acid residues 1–179) coding sequences | 5'-<br>GTTGAGAATAACTATCTGAGTAAAGCCAGAAAGCTCAAAAAGCCGATGA<br>GCTGGCTAAATGTCAGACTGCTGCCTGTAAGGCTCAGACAGAAGCAAAAT<br>GGACGGCAATTGACCTGGGGCAGGATGGTAGCTTTGCTGCAGGAATGATTG<br>CTGGGGTTCTGCCGGGCTGTATGATGCTGTGGATAGTATTGTAAGCAG<br>GTTCTAACCCGACGGAAACCTGGAGGCAATGAAAGCGCTGTTTAAACAGC<br>GGCGATATCTTGGGTTTCGTTATCGGATGCGGTTAAGCAATCTTATATAGAC<br>CGTATTGACCGAATGGAAGCCGAATATCAGAAAGCTGGTACCAGCGGTTTC<br>GTTTAAATGCAGGCGTTGAAGGCGGTAAGCTGATTACTGATATTGCCGGGCT<br>GCTGGCTGGCGGCGTTGGCGTTGTGAAAGGTGGTGCGGTACTGACGGAGA<br>AGGTTGTTGCTAAGGTTGTGGGTAAGTCTGAATCAGCAGCGGCAAAAGTTG<br>GTACAGATATTGTTAAAACAGGAACCGTTTTTCGACTCAATTAAGCGACTC<br>AACCTGCGATACCAGGAACATCCATTCCAAAATCTTTTGAATTACATGTTA<br>ACGGACAAACCGTTTTGGGTAAACCCAAATGCAACTAAACATATGGGCGAA<br>TATTTAACACGGAATGGATTGTCTCACAGTACAGCAGAAGGAAGCCAAGC<br>CATGCTGACCAGTCTTCAAAGTGCGGTTAAAGATGCATTTTCGCAGGGATT<br>AAAATTTAACGAAAAAATGCAAGTTGGACGCTGGGAACTGGTATTTAGCC<br>AACGGTCTTCAGATCCTTATCCAGTATTAAGCATGCGTTGTATAATAAAT<br>GAAATTAAGTGTAGATAGCGTTATTAATGAACCTAGAAGCGTAGCCATTAC<br>TATTGATGGTTATATTCCCGTTGATATAAAGATTATTGATTCTAAAAAGCTT<br>CCGCCTTTGTATTGGCGGGGCGGGGATGGCAAAAAAACCTACTTGAAGT<br>GCTGTACTACCAGAAAATGGTTTTTTATCATCCATCACATTGGTAATGATAG<br>CATCAGACTCAATTCATAAAACAGACTCCTTGTGAGTATCTTACCAAGCA<br>GTGAGTGTGGAGTTCCTGTAGTGAATACAAAACGTGGAGCCACTCAGAAA<br>GTGATGATTTTAGTCGTCGTTTTGTTGACGATTTTAGCCTTGATATTGAGGT<br>GATTATATCATCAGAGTCTATGTTATTAACGATTGGAGAGAATAAAAAGGT |

|  |                                                                                                                                              |
|--|----------------------------------------------------------------------------------------------------------------------------------------------|
|  | AACTAGCTGGATAAAAATGTAGCGATAATTTTTATCTCGGGATAGATGCAGG<br>AAGAAATGTCGTTCAATTTGTATTTGGATAAGTTAACACCAAGTGAAGTGGA<br>AAGTTTTTTTGAGGCAGTAGGTTAG-3' |
|--|----------------------------------------------------------------------------------------------------------------------------------------------|

**Nucleotide sequences of Tu and Ts**

|                                                |                                                                                                                                                                                                                                                                                                                                                                                                                                                                                                                                                                                                                                                                                                                                                                                                                                                                                                                                                                                                                                                                                                                                                                                                                                                                                                                                                                    |
|------------------------------------------------|--------------------------------------------------------------------------------------------------------------------------------------------------------------------------------------------------------------------------------------------------------------------------------------------------------------------------------------------------------------------------------------------------------------------------------------------------------------------------------------------------------------------------------------------------------------------------------------------------------------------------------------------------------------------------------------------------------------------------------------------------------------------------------------------------------------------------------------------------------------------------------------------------------------------------------------------------------------------------------------------------------------------------------------------------------------------------------------------------------------------------------------------------------------------------------------------------------------------------------------------------------------------------------------------------------------------------------------------------------------------|
| Tu (amino acid residues 1–394) coding sequence | <p>5'-</p> <p>TCTAAAGAAAAGTTTGAACGTACAAAACCGCACGTTAACGTCGGTACTAT<br/>CGGCCACGTTGACCATGGTAAAACAACGCTGACCGCTGCAATCACTACCG<br/>TACTGGCTAAAACCTACGGCGGTGCTGCTCGCGCATTTCGACCAGATCGAT<br/>AACGCGCCGGAAGAAAAGCTCGTGGTATCACCATCAACACTTCTCACGT<br/>TGAATACGACACCCCGACCCGTCACTACGCACACGTAGACTGCCCGGGGC<br/>ACGCCGACTATGTTAAAACATGATCACCGGTGCTGCGCAGATGGACGG<br/>CGCGATCCTGGTAGTTGCTGCGACTGACGGCCCGATGCCGCAGACTCGTG<br/>AGCACATCCTGCTGGGTCGTCAGGTAGGCGTTCCGTACATCATCGTGTT<br/>CTGAACAAATGCGACATGGTTGATGACGAAGAGCTGCTGGAAGTGGTTG<br/>AAATGGAAGTTCGTGAACTTCTGTCTCAGTACGACTTCCCGGGCGACGAC<br/>ACTCCGATCGTTCGTGGTTCGCTCTGAAAGCGCTGGAAGGCGACGCAGA<br/>GTGGGAAGCGAAAATCCTGGAAGTGGCTGGCTTCCTGGATTCTTACATTC<br/>CGGAACCAGAGCGTGCATTGACAAGCCGTTCTGCTGCCGATCGAAGA<br/>CGTATTCTCCATCTCCGGTCGTGGTACCGTTGTTACCGGTTCGTGTAGAACG<br/>CGGTATCATCAAAGTTGGTGAAGAAGTTGAAATCGTTGGTATCAAAGAG<br/>ACTCAGAAGTCTACCTGTACTGGCGTTGAAATGTTCCGCAAAGTCTGGA<br/>CGAAGGCCGTGCTGGTGAGAACGTAGGTGTTCTGCTGCGTGGTATCAAAC<br/>GTGAAGAAATCGAACGTGGTCAGGTACTGGCTAAGCCGGGCACCATCAA<br/>GCCGCACACCAAGTTCGAATCTGAAGGTACATTCTGTCCAAAGATGAAG<br/>GCGGCCGTACTACTCCGTTCTTCAAAGGCTACCGTCCGCAGTTCTACTTCC<br/>GTACTACTGACGTGACTGGTACCATCGAACTGCCGGAAGGCGTAGAGAT<br/>GGTAATGCCGGGCGACAACATCAAAAATGGTTGTTACCCTGATCCACCCGA<br/>TCGCGATGGACGACGGTCTGCGTTTCGCAATCCGTGAAGGCGGCCGTACC<br/>GTTGGCGCGGGCGTTGTAGCAAAAAGTTCTGAGCTAA-3'</p> |
| Ts (amino acid residues 1–283) coding sequence | <p>5'-</p> <p>GCTGAAATTACCGCATCCCTGGTAAAAGAGCTGCGTGAGCGTACTGGCG<br/>CAGGCATGATGGATTGCAAAAAGCACTGACTGAAGCTAACGGCGACAT<br/>CGAGCTGGCAATCGAAAACATGCGTAAGTCCGGTGTATTAAAGCAGCG<br/>AAAAAAGCAGGCAACGTTGCTGCTGACGGCGTGATCAAACCAAATCG<br/>ACGGCAACTACGGCATATTCTGGAAGTTAACTGCCAGACTGACTTCGTT<br/>GCAAAAAGACGCTGGTTTCCAGGCGTTCGCAGACAAAGTTCTGGACGCAG<br/>CTGTTGCTGGCAAATCACTGACGTTGAAGTTCTGAAAGCACAGTTTCGAA<br/>GAAGAACGTGTTGCGCTGGTAGCGAAAATTGGTGAAAACATCAACATTC</p>                                                                                                                                                                                                                                                                                                                                                                                                                                                                                                                                                                                                                                                                                                                                                                                                                                                                                                        |

|                                                                                                                                                                                                                                                                                                                                                                                                                                                                                                               |
|---------------------------------------------------------------------------------------------------------------------------------------------------------------------------------------------------------------------------------------------------------------------------------------------------------------------------------------------------------------------------------------------------------------------------------------------------------------------------------------------------------------|
| GCCGCGTTGCTGCGCTGGAAGGCGACGTTCTGGGTTCTTATCAGCACGGT<br>GCGCGTATCGGCGTTCTGGTTGCTGCTAAAGGCGCTGACGAAGAGCTGGT<br>TAAACACATCGCTATGCACGTTGCTGCAAGCAAGCCAGAATTCATCAA<br>CCGGAAGACGTATCCGCTGAAGTGGTAGAAAAAGAATACCAGGTACAGC<br>TGGATATCGCGATGCAGTCTGGTAAGCCGAAAGAAATCGCAGAGAAAAT<br>GGTTGAAGGCCGCATGAAGAAATTCACCGGCGAAGTTTCTCTGACCGGT<br>CAGCCGTTTCGTTATGGAACCAAGCAAACTGTTGGTCAGCTGCTGAAAG<br>AGCATAACGCTGAAGTGACTGGCTTCATCCGCTTCGAAGTGGGTGAAGG<br>CATCGAGAAAGTTGAGACTGACTTTACAGCAGAAGTTGCTGCGATGTCC<br>AAGCAGTCTTGA-3' |
|---------------------------------------------------------------------------------------------------------------------------------------------------------------------------------------------------------------------------------------------------------------------------------------------------------------------------------------------------------------------------------------------------------------------------------------------------------------------------------------------------------------|

## Supplementary Table S2: Oligonucleotide sequences

| Oligonucleotide    | Sequence (5' to 3' direction)        |
|--------------------|--------------------------------------|
| GlnRS-for_NdeI     | AGCTAGCTCATATGAGTGAGGCAGAAGCCCG      |
| GlnRS-rev_XhoI     | AGCTCTCGAGCTCGCCTACTTTCGCCCAGGTA     |
| Tu_N51A-for        | gcgGCGCCGGAAGAAAAAGCTCGTGGTATCACC    |
| Tu_N51A-rev        | ATCGATCTGGTTCGAATGCGCGAGCAGCACC      |
| Tu_E54A-for        | gcgGAAAAAGCTCGTGGTATCACCATCAACTTC    |
| Tu_E54A-rev        | CGGCGCGTTATCGATCTGGTTCGAATGCGCGAGC   |
| Tu_R58A-for        | gcgGGTATCACCATCAACTTCTCACGTTG        |
| Tu_R58A-rev        | AGCTTTTTCTTCCGGCGCGTTATCGATCTGGTCG   |
| Tu_H66A-for        | gcgGTTGAATACGACACCCCGACCCGTCACTACG   |
| Tu_H66A-rev        | AGAAGTGTTGATGGTGATACCACGAGCTTTTTTC   |
| Tu_H84A-for        | gcgGCCGACTATGTTAAAAACATGATCACCCGG    |
| Tu_H84A-rev        | CCCCGGGCAGTCTACGTGTGCGTAGTGACGGGTC   |
| Tu_Y87A-for        | gcgGTTAAAAACATGATCACCCGGTGCTGCGCAGA  |
| Tu_Y87A-rev        | GTCGGCGTGCCCCGGGCAGTCTACGTGTGC       |
| Tu_K89A N90A-for   | gcggcgATGATCACCCGGTGCTGCGCAGATGGAC   |
| Tu_K89A N90A-rev   | AACATAGTCGGCGTGCCCCGGGCAGTCTACGTG    |
| Tu_N135A-for       | gcgAAATGCGACATGGTTGATGACGAAGAGCTGC   |
| Tu_N135A-rev       | CAGGAACACGATGATGTACGGAACGCCTACCTG    |
| Tu_F218A-for       | gcgTCCATCTCCGGTCGTGGTACCGTTGTTACCCGG |
| Tu_F218A-rev       | TACGTCTTCGATCGGCAGCAGGAACGGCTTG      |
| Tu_R223A-for       | gcgGGTACCGTTGTTACCGGTCGTGTAGAACGCGG  |
| Tu_R223A-rev       | ACCGGAGATGGAGAATACGTCTTCGATCGGCAGC   |
| Tu_E259A-for       | gcgATGTTCCGCAAAGCTGCTGGACGAAGGCCG    |
| Tu_E259A-rev       | AACGCCAGTACAGGTAGACTTCTGAGTCTCTTTG   |
| Tu_R262A-for       | gcgAAACTGCTGGACGAAGGCCGTGCTGGTGAG    |
| Tu_R262A-rev       | GAACATTTCAACGCCAGTACAGGTAGACTTCTGAG  |
| Tu_R283A-for       | gcgGAAGAAATCGAACGTGGTCAGGTACTGGC     |
| Tu_R283A-rev       | TTTGATACCACGCAGCAGAACACCTACGTTCTC    |
| Tu_R288A-for       | gcgGGTCAGGTACTGGCTAAGCCGGGCACCATC    |
| Tu_R288A-rev       | TTCGATTTCTTCAGTTTGATACCACGCAGCAG     |
| Tu_R318A H319A-for | gcggegACTCCGTTCTTCAAAGGCTACCGTCCGC   |
| Tu_R319A H319A-rev | GCCGCCTTCATCTTTGGACAGAATGTACTTCAG    |
| Tu_T320A-for       | gcgCCGTTCTTCAAAGGCTACCGTCCGCAG       |
| Tu_T320A-rev       | ATGACGGCCGCCTTCATCTTTGGACAGAATGTAC   |
| Ts_A202E-for       | gaaATGCAGTCTGGTAAGCCGAAAGAAATC       |
| Ts_A202E-rev       | GATATCCAGCTGTACCTGGTATTCTTTTTCTACC   |

|                          |                                                   |
|--------------------------|---------------------------------------------------|
| Ts_K207A K209A-for       | gcgCCGgcgGAAATCGCAGAGAAAATGGTTGAAGGC              |
| Ts_K207A K209A-rev       | ACCAGACTGCATCGCGATATCCAGCTGTACC                   |
| Ts_K214E-for             | gaaATGGTTGAAGGCCGCATGAAGAAATTCACC                 |
| Ts_K214E-rev             | CTCTGCGATTTCTTTTCGGCTTACCAGACTGCATC               |
| Ts_R219P-for             | ccgATGAAGAAATTCACCGGCGAAGTTTCTCTG                 |
| Ts_R219P-rev             | GCCTTCAACCATTTTCTCTGCGATTTCTTTTCGG                |
| Ts_R219A K221A K222A-for | gcgATGgcgcgTTCACCGGCGAAGTTTCTCTG                  |
| Ts_R219A K221A K222A-rev | GCCTTCAACCATTTTCTCTGCGATTTCTTTTCGG                |
| CdiA-for_NdeI            | AGCTAGCTCATATGGTTGAGAATAACTATCTGAGTAAAGCC         |
| CdiA-rev_XhoI_HindIII    | AGCTAAGCTTCTCGAGTTATTTATACAACGCATGCTTTAATACTGG    |
| CdiI-for_NdeI            | AGCTAGCTCATATGAAATTAAGTGTAGATAGCGTT               |
| CdiI-rev_XhoI            | AGCTCTCGAGCTAACCTACTGCCTCAA                       |
| CdiA_H281A-for           | gctGCGTTGTATAAATAATGAAATTAAGT                     |
| CdiA_H281A-rev           | CTTTAATACTGGATAAGGATCTG                           |
| CdiAΔC5-rev_XhoI_HindIII | AGCTAAGCTTCTCGAGTTACTTTAATACTGGATAAGGATCTGAAGACCG |
| CdiA_H216A-for           | GCGATGGGCGAATATTTAACACGGAATGG                     |
| CdiA_H216A-rev           | TTTAGTTGCATTTGGGTTTACCCAAACGG                     |
| CdiA_Y220F-for           | TTTTTAACACGGAATGGATTGTCTCACAG                     |
| CdiA_Y220F-rev           | TTCGCCCATGTGTTAGTTGCATTTGGG                       |
| CdiA_R263A-for           | gccTGGGAAGTGGTATTTAGCCAACGG                       |
| CdiA_R263A-rev           | TCCAAGTGCATTTTTTTCGTTAAATTTAATCC                  |
| CdiA_R271A-for           | gcgTCTTCAGATCCTTATCCAGTATTAAAG                    |
| CdiA_R271A-rev           | TTGGCTAAATACCAGTTCACGCGTCC                        |
| Ala_probe                | TGGAGCTAAGCGGGATCGAACCGCTGaCCTCTTGC               |
| Asn_probe                | CTCCTCTGACTGGACTCGAACCGTGCATACGGA                 |
| Gln_probe                | CTGGGGTACGAGGATTCGAACCTCGGaATGCCGGA               |
| Met_probe                | TGGCTACGACGGGATTCGAACCTGTGACCCCATCA               |
| fMet_probe               | TTGCGGGGGCCGGATTTGAACCGACGaCCTTCGGG               |
| Trp_probe                | CAGGGGCGGAGAGACTCGAACTCCCAaCACCCGGT               |
| Infusion_sumo_TsTu_For   | aacagattggtggtCATATGGCTGAAATTACCGCATCCCTG         |
| Infusion_sumo_TsTu_Rev   | ccctcgagccgggCATATGTTAGCTCAGAACTTTTGCTACAACG      |

## Supplementary References

1. Suzuki, T., Terasaki, M., Takemoto-Hori, C., Hanada, T., Ueda, T., Wada, A. and Watanabe, K. (2001) Proteomic Analysis of the Mammalian Mitochondrial Ribosome: IDENTIFICATION OF PROTEIN COMPONENTS IN THE 28 S SMALL SUBUNIT\*. *Journal of Biological Chemistry*, **276**, 33181-33195.
2. Chan, P.P. and Lowe, T.M. (2015) GtRNAdb 2.0: an expanded database of transfer RNA genes identified in complete and draft genomes. *Nucleic Acids Res.*, **44**, D184-D189.
3. Wieden, H.-J., Gromadski, K., Rodnin, D. and Rodnina, M.V. (2002) Mechanism of Elongation Factor (EF)-Ts-catalyzed Nucleotide Exchange in EF-Tu: CONTRIBUTION OF CONTACTS AT THE GUANINE BASE\*. *Journal of Biological Chemistry*, **277**, 6032-6036.
4. Michalska, K., Gucinski, G.C., Garza-Sanchez, F., Johnson, P.M., Stols, L.M., Eschenfeldt, W.H., Babnigg, G., Low, D.A., Goulding, C.W., Joachimiak, A. *et al.* (2017) Structure of a novel antibacterial toxin that exploits elongation factor Tu to cleave specific transfer RNAs. *Nucleic Acids Res*, **45**, 10306-10320.
5. Gucinski, G.C., Michalska, K., Garza-Sánchez, F., Eschenfeldt, W.H., Stols, L., Nguyen, J.Y., Goulding, C.W., Joachimiak, A. and Hayes, C.S. (2019) Convergent Evolution of the Barnase/EndoU/Colicin/RelE (BECR) Fold in Antibacterial tRNase Toxins. *Structure (London, England : 1993)*, **27**, 1660-1674.e1665.
6. Nissen, P., Thirup, S., Kjeldgaard, M. and Nyborg, J. (1999) The crystal structure of Cys-tRNA<sup>Cys</sup>-EF-Tu-GDPNP reveals general and specific features in the ternary complex and in tRNA. *Structure*, **7**, 143-156.
